1 **Risk factors for long-term consequences of COVID-19 in hospitalised**  
2 **adults in Moscow using the ISARIC Global follow-up protocol:**  
3 **StopCOVID cohort study**

4 Daniel Munblit<sup>1,2,3\*</sup>, Polina Bobkova<sup>1\*</sup>, Ekaterina Spiridonova<sup>1\*</sup>, Anastasia Shikhaleva<sup>1\*</sup>,  
5 Aysylu Gamirova<sup>1\*</sup>, Oleg Blyuss<sup>1,4\*</sup>, Nikita Nekliudov<sup>1</sup>, Polina Bugaeva<sup>1</sup>, Margarita  
6 Andreeva<sup>1</sup>, Audrey DunnGalvin<sup>1,5</sup>, Pasquale Comberiat<sup>6</sup>, Christian Apfelbacher<sup>7</sup>, Jon  
7 Genuneit<sup>8</sup>, Sergey Avdeev<sup>9</sup>, Valentina Kapustina<sup>10</sup>, Alla Guekht<sup>3</sup>, Victor Fomin<sup>11</sup>, Andrey A  
8 Svistunov<sup>11</sup>, Peter Timashev<sup>12</sup>, Thomas M Drake<sup>13</sup>, Sarah Wulf Hanson<sup>14</sup>, Laura Merson<sup>15</sup>,  
9 Peter Horby<sup>15</sup>, Louise Sigfrid<sup>15</sup>, Janet T Scott<sup>16</sup>, Malcolm G Semple<sup>17,18</sup>, John O Warner<sup>2</sup>, Theo  
10 Vos<sup>14</sup>, Piero Olliaro<sup>15</sup>, Petr Glybochko<sup>11</sup>, Denis Butnaru<sup>11</sup> and Sechenov StopCOVID Research  
11 Team

- 12 1. Department of Paediatrics and Paediatric Infectious Diseases, Institute of Child's Health,  
13 Sechenov First Moscow State Medical University (Sechenov University), Moscow, Russia  
14 2. Inflammation, Repair and Development Section, National Heart and Lung Institute, Faculty of  
15 Medicine, Imperial College London, London, United Kingdom  
16 3. Research and Clinical Center for Neuropsychiatry, Moscow, Russia  
17 4. School of Physics, Astronomy and Mathematics, University of Hertfordshire, College Lane,  
18 Hatfield, United Kingdom  
19 5. School of Applied Psychology, University College Cork, Cork City, Ireland  
20 6. Department of Clinical and Experimental Medicine, Section of Pediatrics, University of Pisa, Pisa,  
21 Italy  
22 7. Institute of Social Medicine and Health Systems Research, Faculty of Medicine, Otto von Guericke  
23 University Magdeburg, Magdeburg, Germany  
24 8. Pediatric Epidemiology, Department of Pediatrics, Medical Faculty, Leipzig University, Leipzig,  
25 Germany  
26 9. Clinic of Pulmonology, Sechenov First Moscow State Medical University (Sechenov University),  
27 Moscow, Russia  
28 10. Department of Internal Medicine №1, Institute of Clinical Medicine, Sechenov First Moscow State  
29 Medical University (Sechenov University), Moscow, Russia  
30 11. Sechenov First Moscow State Medical University (Sechenov University), Moscow, Russia  
31 12. Institute for Regenerative Medicine, Sechenov First Moscow State Medical University (Sechenov  
32 University), Moscow, Russia  
33 13. Centre for Medical Informatics, University of Edinburgh, Edinburgh, UK  
34 14. Institute for Health Metrics and Evaluation, University of Washington, Seattle, USA  
35 15. ISARIC Global Support Centre, Nuffield Department of Medicine, University of Oxford, Oxford,  
36 UK  
37 16. MRC-University of Glasgow Centre for Virus Research, Glasgow, UK  
38 17. Health Protection Research Unit in Emerging and Zoonotic Infections, Institute of Infection,  
39 Veterinary and Ecological Sciences, Faculty of Health and Life Sciences, University of Liverpool,  
40 Liverpool, UK  
41 18. Department of Respiratory Medicine, Alder Hey Children's Hospital, Liverpool, UK  
42  
43

44 \*Authors contributed equally to the paper.  
45  
46

47

48

49

**Corresponding author:**

50

Daniel Munblit, MD, PhD. Department of Paediatrics and Paediatric Infectious Diseases, Institute of Child's Health, Sechenov First Moscow State Medical University (Sechenov University), Moscow, Russia and Inflammation, Repair and Development Section, National Heart and Lung Institute, Faculty of Medicine, Imperial College London, London, United Kingdom

54

Email: [daniel.munblito8@imperial.ac.uk](mailto:daniel.munblito8@imperial.ac.uk)

55

56

57

**Sechenov StopCOVID Research Team (Group authors)**

58

Elina Abdeeva<sup>1</sup>, Nikol Alekseeva<sup>1</sup>, Elena Antsiferova<sup>1</sup>, Elena Artigas<sup>1</sup>, Anastasiia Bairashevskaya<sup>1</sup>, Anna Belkina<sup>1</sup>, Vadim Bezrukov<sup>1</sup>, Semyon Bordyugov<sup>1</sup>, Maria Bratukhina<sup>1</sup>, Salima Deunezhewa<sup>1</sup>, Khalisa Elifkhanova<sup>1</sup>, Anastasia Ezhova<sup>1</sup>, Yulia Filippova<sup>1</sup>, Aleksandra Frolova<sup>1</sup>, Julia Ganieva<sup>1</sup>, Anastasia Gorina<sup>1</sup>, Yulia Kalan<sup>1</sup>, Bogdan Kirillov<sup>1</sup>, Mariia Korgunova<sup>1</sup>, Alexandra Krupina<sup>1</sup>, Anna Kuznetsova<sup>1</sup>, Ekaterina Listovskaia<sup>1</sup>, Margarita Mikheeva<sup>1</sup>, Aigun Mursalova<sup>1</sup>, Marina Ogandzhanova<sup>1</sup>, Mikhail Rumyantsev<sup>1</sup>, Denis Smirnov<sup>1</sup>, Nataliya Shishkina<sup>1</sup>, Yasmin El-Taravi<sup>1</sup>, Maria Varaksina<sup>1</sup>, Maria Vodianova<sup>1</sup>, Anna Zezyulina<sup>1</sup>

66

67

1. Sechenov First Moscow State Medical University (Sechenov University), Moscow, Russia

68

69

*The names of the authors are in alphabetic order*

70

71

## 72 ABSTRACT

73 **Background** The long-term sequelae of COVID-19 remain poorly characterised. In this  
74 study, we aimed to assess long-standing symptoms (LS) (symptoms lasting from the time of  
75 discharge) in previously hospitalised patients with COVID-19 and assess associated risk  
76 factors.

77 **Methods** This is a longitudinal cohort study of adults ( $\geq 18$  years of age) with clinically  
78 diagnosed or laboratory-confirmed COVID-19 admitted to Sechenov University Hospital  
79 Network in Moscow, Russia. Data were collected from patients discharged between April 8  
80 and July 10, 2020. Participants were interviewed via telephone using Tier 1 ISARIC Long-  
81 term Follow-up Study CRF and the WHO CRF for Post COVID conditions. Reported  
82 symptoms were further categorised based on the system(s) involved. Additional information  
83 on dyspnoea, quality of life and fatigue was collected using validated instruments.  
84 Multivariable logistic regressions were performed to investigate risk factors for development  
85 of LS categories.

86 **Findings** Overall, 2,649 of 4,755 patients discharged from the hospitals were available for  
87 the follow-up and included in the study. The median age of the patients was 56 years (IQR,  
88 46–66) and 1,353 (51.1%) were women. The median follow-up time since hospital discharge  
89 was 217.5 (200.4–235.5) days. At the time of the follow-up interview 1247 (47.1%)  
90 participants reported LS. Fatigue (21.2%, 551/2599), shortness of breath (14.5%, 378/2614)  
91 and forgetfulness (9.1%, 237/2597) were the most common LS reported. Chronic fatigue  
92 (25%, 658/2593) and respiratory (17.2% 451/2616) were the most common LS categories.  
93 with reporting of multi-system involvement (MSI) less common (11.3%; 299). Female sex  
94 was associated with LS categories of chronic fatigue with an odds ratio of 1.67 (95%  
95 confidence interval 1.39 to 2.02), neurological (2.03, 1.60 to 2.58), mood and behaviour  
96 (1.83, 1.41 to 2.40), dermatological (3.26, 2.36 to 4.57), gastrointestinal (2.50, 1.64 to 3.89),  
97 sensory (1.73, 2.06 to 2.89) and respiratory (1.31, 1.06 to 1.62). Pre-existing asthma was  
98 associated with neurological (1.95, 1.25 to 2.98) and mood and behavioural changes (2.02,  
99 1.24 to 3.18) and chronic pulmonary disease was associated with chronic fatigue (1.68, 1.21 to  
100 2.32).

101 **Interpretation** 6 to 8 months after acute infection episode almost a half of patients  
102 experience symptoms lasting since hospital discharge. One in ten individuals experiences  
103 MSI. Female sex is the main risk factor for majority of the LS categories. chronic pulmonary  
104 disease is associated with a higher risk of chronic fatigue development, and asthma with  
105 neurological and mood and behaviour changes. Individuals with LS and MSI should be the  
106 main target for future research and intervention strategies.

107 **Funding** This study is supported by Russian Fund for Basic Research and UK Embassy in  
108 Moscow. The ISARIC work is supported by grants from: the NIHR Health Protection  
109 Research Unit (HPRU) in Emerging and Zoonotic Infections at University of Liverpool in  
110 partnership with Public Health England (PHE), in collaboration with Liverpool School of  
111 Tropical Medicine and the University of Oxford [award 200907], Wellcome Trust and  
112 Department for International Development [215091/Z/18/Z], and the Bill and Melinda Gates  
113 Foundation [OPP1209135], EU Platform for European Preparedness Against (Re-) emerging  
114 Epidemics (PREPARE) [FP7 project 602525] This research was funded in part, by the  
115 Wellcome Trust. The views expressed are those of the authors and not necessarily those of  
116 the DID, NIHR, Wellcome Trust or PHE.

117

118 **Word count:**

119

## **Research in context**

### ***Evidence before this study***

Evidence suggests that COVID-19 may result in short- and long-term consequences to health. Most studies do not provide definitive answers due to a combination of short follow-up (2-3 months), small sample size, and use of non-standardised tools. There is a need to study the longer-term health consequences of previously hospitalised patients with COVID-19 infection and to identify risk factors for sequelae.

### ***Added value of this study***

To our knowledge, this is the largest cohort study (n=2,649) with the longest follow-up since hospital discharge (6-8 months) of previously hospitalised adult patients. We found that 6-8 months after discharge from the hospital, around a half (47.1%) of patients reported at least one long-standing symptom since discharge. Once categories of symptoms were assessed, chronic fatigue and respiratory problems were the most frequent clusters of long-standing symptoms in our patients. Of those patients having long-term symptoms, a smaller proportion (11.3%) had multisystem involvement, with three or more categories of long-standing symptoms present. Although most patients developed symptoms since discharge, a smaller number of individuals experienced symptom beginning weeks or months after the acute phase. Female sex was a predictor for most of the symptom categories at the time of the follow-up interview, with chronic pulmonary disease associated with chronic fatigue-related symptoms, and asthma with a higher risk of neurological symptoms, mood and behaviour problems.

### ***Implications of all the available evidence***

The majority of patients experienced long-lasting symptoms 6 to 8 months after hospital discharge and almost half reported at least one long-standing symptom, with chronic fatigue and respiratory problems being the most frequent. A smaller number reported multisystem impacts with three or more long-standing categories present at follow-up. A higher risk was found for women, for chronic pulmonary disease with chronic fatigue, and neurological symptoms and mood and behaviour problems with asthma. Patterns of the symptom development following COVID-19 should be further investigated in future research.

120

## 121 INTRODUCTION

122 The emergence of severe acute respiratory syndrome coronavirus 2 (SARS-CoV-2) has placed  
123 a significant burden on health services and society world-wide. There have now been well  
124 over 100 million coronavirus disease 2019 (COVID-19) cases reported with a mortality rate  
125 of around 2.2% globally<sup>1</sup>. The acute presentation of COVID-19 has now been well  
126 investigated, with fever, cough, shortness of breath and anosmia among the most commonly  
127 reported symptoms<sup>2-4</sup>.

128

129 It has become evident that a substantial proportion of people experience ongoing symptoms  
130 including fatigue and muscle weakness, joint and muscle pain, and breathlessness, months  
131 after the acute phase of COVID-19<sup>5-7</sup>. This phenomenon is now commonly referred to as  
132 Long COVID but has also been described as post-COVID syndrome, the post-COVID-19  
133 condition<sup>8</sup> or patients have been labelled COVID long-haulers<sup>9,10</sup>. The recently published UK  
134 National Institute for Health and Clinical Excellence (NICE) COVID-19 guideline defines the  
135 syndrome as “signs and symptoms that develop during or after an infection consistent with  
136 COVID-19, continue for more than 12 weeks and are not explained by an alternative  
137 diagnosis”<sup>11</sup>. However, publications have used a range of definitions based on limited  
138 evidence from small, heterogeneous cohorts<sup>7</sup>. Overall, there is still a paucity of long-term  
139 follow-up data, which means we have limited knowledge of the full range of symptoms,  
140 duration of disease and potential risk factors. Recently published data from China describing  
141 long-term consequences of COVID-19 show that 76% of previously hospitalised adult  
142 patients have at least one symptom 6 months after acute infection<sup>6</sup>.

143

144 There is an urgent need for accurate long-term follow-up of COVID-19 patients<sup>7</sup>, to inform  
145 future management plans and address the devastating impacts of this condition on the  
146 quality of life (QoL) of people affected. This observational cohort study aimed to investigate  
147 the incidence of long-term consequences in adults previously hospitalised for COVID-19 and  
148 to assess risk factors for Long COVID in Moscow, Russia. We used the standardised follow-  
149 up data collection protocol of the International Severe Acute Respiratory and Emerging  
150 Infection Consortium (ISARIC).

151

## 152 METHODS

### 153 Study design, setting and participants

154 This is a longitudinal cohort study of patients with suspected or confirmed COVID-19  
155 infection admitted to four Sechenov University Hospital Network in Moscow, Russia. We

156 collected the follow-up data between December 2, 2020 and January 14, 2021 from patients  
157 discharged between April 8, 2020 and July 10, 2020. We included adult patients ( $\geq 18$  years  
158 of age), with both reverse transcriptase polymerase chain reaction (RT-PCR) confirmed  
159 SARS-CoV-2 infection, corresponding to U07.1 as per International Classification of Diseases  
160 (ICD), and clinically confirmed infection, encoded as U07.2 when the laboratory testing  
161 result is negative, inconclusive or unavailable.

162

163 The acute phase data were extracted from electronic medical records (EMR) and the Local  
164 Health Information System (HIS) at the host institution using the modified and translated  
165 ISARIC WHO Clinical Characterisation protocol (CCP)<sup>12</sup>. Details of the acute phase data  
166 collection are described elsewhere<sup>3</sup>. The acute-phase dataset included demographics,  
167 symptoms, comorbidities, chest computer tomography (CT) reports, supportive care data,  
168 and clinical outcomes at discharge. The study was approved by the Sechenov University  
169 Local Ethics Committee on April 22, 2020 (protocol number 08–20). A protocol amendment  
170 enabling serial follow-up of the cohort was approved on November 13, 2020.

171

172 Information about the current condition and persisting symptoms was collected by  
173 telephone using the Tier 1 ISARIC Long-term Follow-up Study case report form (CRF)  
174 developed by the ISARIC Global COVID-19 follow up working group, with adaptations,  
175 translated into Russian assessing the patients' physical and mental health<sup>9</sup>. Additional  
176 information was added from the WHO CRF for Post COVID conditions<sup>13</sup>. The follow-up CRF  
177 documented data on demographics, lifestyle and socioeconomic data, history of vaccination,  
178 hospital stay and readmissions, mortality (after the initial index event), presence of newly  
179 developed symptoms at the time of follow-up interview and symptom duration (1-2 weeks; >  
180 2-4 weeks; >1-2 months; >2-3 months; >3-6 months; from the time of discharge), dyspnoea,  
181 fatigue, quality of life (QoL) and difficulties in functioning before the COVID-19 illness and  
182 at the time of the follow-up (**Supplementary material**).

183

184 The participants were asked to report on dyspnoea, QoL and difficulties in functioning before  
185 the COVID-19 illness (retrospectively) and presently (at the time they were completing the  
186 questionnaire), to enable comparative assessment of the respective variables. We used the  
187 British Medical Research Council (MRC) dyspnoea scale, the EuroQoL five-dimension five-  
188 level (EQ-5D-5L) questionnaire, the EuroQoL Visual Analogue Scale (EQ-VAS) asking  
189 participants to score their QoL from 0 (worst imaginable health) to 100 (best imaginable  
190 health), UNICEF/Washington disability score and World Health Organisation Disability  
191 Assessment Schedule (WHODAS 2.0). The study was registered with EuroQoL as part of the  
192 ISARIC collaborative effort (EuroQoL ID 37035).

193

194 Data collection and entry were performed by a team of medical students who signed  
195 confidentiality agreements, underwent training in basic data entry into REDCap and  
196 telephone interviews. Students have already had extensive data extraction experience gained  
197 from the previous research<sup>3</sup> and were supervised by senior academic staff members.

198

199 The research team members attempted to contact patients three times before declaring them  
200 lost to follow up. If available by telephone, the patients were asked to provide their verbal  
201 consent to the interview. The patient's record ID was cross-checked with existing  
202 demographic data to ensure reliable collation of the follow-up surveys with the existing  
203 acute-phase data extracted previously.

204

### 205 **Data management**

206 We used REDCap electronic data capture tools (Vanderbilt University, Nashville, TN, USA)  
207 hosted at Sechenov University and Microsoft Excel (Microsoft Corp, Redmond, WA, USA) for  
208 data collection, storage and management<sup>11,12</sup>. The baseline characteristics, including  
209 demographics, symptoms on admission and comorbidities had been extracted from EMRs  
210 and entered into REDCap previously.

### 211 **Definitions**

212 The acute disease severity was stratified in accordance with Arnold et al.<sup>10</sup> by a three-  
213 category scale based on the degree of required supportive care during hospital stay: mild (no  
214 supplementary oxygen or intensive care), moderate (supplementary oxygen during  
215 hospitalisation) and severe (need for non-invasive respiratory modalities (NIV), invasive  
216 mechanical ventilation (IMV) and/or admission to intensive care unit (ICU)). A difference of  
217 10 points at EQ-VAS defined relevant change in the health status<sup>4</sup>.

218

219 For the purpose of this study, we defined “long-standing symptoms” (LS) as symptoms  
220 present since hospital discharge. LS present at the time of follow-up were also categorised  
221 into respiratory, gastrointestinal, dermatological, chronic fatigue, neurological, mood and  
222 behaviour, sensory (**Table S1**). Symptom categorisation was based on previously published  
223 literature<sup>14,15</sup> and international expert group discussions.

### 224 **Outcomes**

225 The primary outcomes included the prevalence of LS and prevalence of categories of LS at  
226 follow-up.



227

228 The secondary outcomes included any symptom prevalence at follow-up (regardless of their  
229 duration), and health status assessed by EuroQoL VAS, fatigue scale, and MRC dyspnea  
230 scale.

### 231 **Statistical analysis**

232 Descriptive statistics were calculated for baseline characteristics. Continuous variables were  
233 summarised as median (with interquartile range) and categorical variables as frequency  
234 (percentage). The chi-squared test or Fisher's exact test was used for testing differences in  
235 proportions between groups. The Wilcoxon rank-sum test was used for testing the  
236 hypotheses about differences in means between the groups.

237

238 We performed multivariable logistic regression to investigate associations of demographic  
239 characteristics, comorbidities, and severity of acute phase COVID-19 with LS categories  
240 presence at the time of the follow-up interview. To enhance the robustness of the effect  
241 estimates, only comorbidities that were present in at least 3% of the cohort were included in  
242 the modelling. Primary analysis was performed using the full dataset, whereas sensitivity  
243 analysis included only a subset of people with RT-PCR confirmed SARS-CoV-2 infection  
244 (ICD U07.1). We have previously found no significant differences in clinical signs, symptoms,  
245 laboratory test results and risk factors for in-hospital mortality between clinically diagnosed  
246 patients and patients with positive RT-PCR <sup>3</sup>. Therefore, primary analysis was performed  
247 using the full cohort. Robustness of findings was then investigated via sensitivity analysis  
248 which included only a subset with confirmed SARS-CoV-2 infection. We have not performed  
249 any imputation for missing data.

250

251 Venn diagrams were used to present the coexistence of the five most common long-standing  
252 symptoms.

253

254 Two-sided p-values were reported for all statistical tests, a p-value below 0.05 was  
255 considered to be statistically significant. Statistical analysis was performed using R version  
256 3.5.1.

257

### 258 **Role of the funding source**

259 The funder of the study had no role in study design, data collection, data analysis, data  
260 interpretation, or writing of the report. All authors had full access to all the data in the study  
261 and had final responsibility for the decision to submit for publication.

## 262 RESULTS

263 As outlined in **Figure 1**, out of 5,040 patients hospitalised with suspected COVID-19 to the  
264 hospitals before July 10, 2020, 4,755 were discharged alive or transferred to another facility.  
265 Out of 4,019 patients with accurate contact information available, 2,649 were available for  
266 follow-up (response rate 68.5%), 2,649 of whom had no missing baseline data in the  
267 electronic database and were included in the analysis. Of the 3,868 patients with contact  
268 information available 52 (1.3%) died after the hospital discharge.

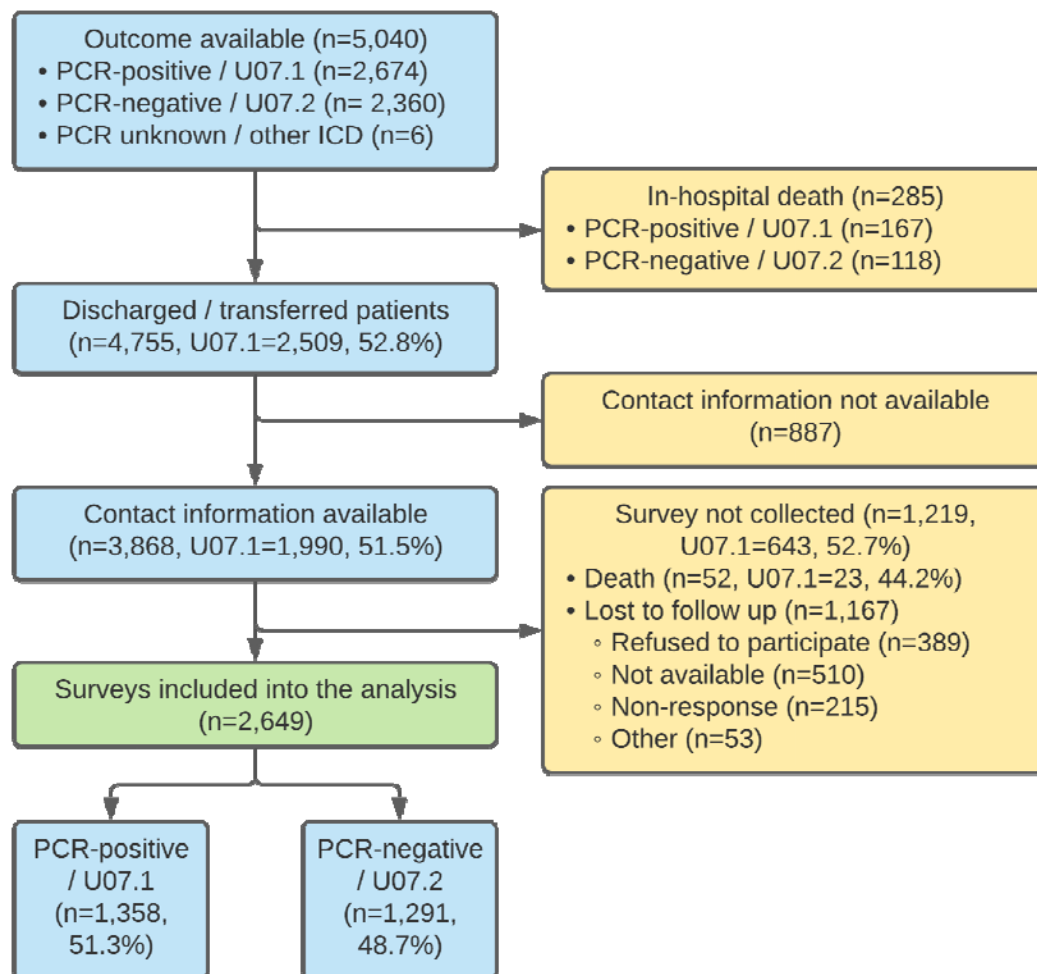

269  
270 **Figure 1.** Flow diagram of patients with COVID-19 admitted to Sechenov University Hospital  
271 Network between April 8 and July 10, 2020. PCR, polymerase chain reaction.

272  
273 Out of 2,649 participants, 1,358 patients (51.3%) had RT-PCR-confirmed SARS-CoV-2  
274 infection, whereas 1291 (48.7%) were clinically diagnosed with COVID-19. In-hospital case  
275 fatality ratio was 167/2674 (6.2%) in laboratory-confirmed and 118/2360 (5%) in clinically  
276 diagnosed patients (p=0.09). The median age was 56 years (IQR, 46–66; range, 18–100

277 years), 1,353 (51.1%) were women. Median follow-up time post-discharge was 217.5 days  
278 (IQR 200.4-235.5, range 18-100). 1,948 participants (77.4%) had a higher education; 1,531,  
279 (59.8%) of the participants were working part- or full-time and 830 (32.4%) were retired  
280 (**Table 1**).

281

282 The most common pre-existing comorbidity on admission was hypertension (1,219, 46.2%),  
283 followed by obesity (514, 19.6%) and type II diabetes (369, 14.1%). Most of the patients had  
284 mild COVID-19 (1,637, 63.2%), with 902 (34%) classified as moderate and 68 (2.6%) as  
285 severe, respectively.

286

287 At the time of the follow-up interview, 1115 (42.1%) of the participants reported no  
288 symptoms, 444 (16.8%) reported one, 313 (11.8%) two and 777 (29.3%) three or more  
289 symptoms, with fatigue, shortness of breath, and forgetfulness being the most common. Just  
290 under half (1247;47.1%) reported one or more LS. Persistent fatigue 551/2599 (21.2%),  
291 breathlessness 378/2614 (14.5%), forgetfulness 237/2597 (9.1%), muscle weakness 199/2592  
292 (7.7%), problems seeing 198/2598 (7.6%), hair loss 183/2580 (7.1%), and problems sleeping  
293 180/2583 (7%) were the most common LS reported at follow-up. Detailed information on all  
294 the symptoms, including duration, is presented in **Table S2**.

295

296 Although many patients had LS since discharge, some participants reported at least one  
297 symptom of a differing duration during follow-up interview; 285 (10.8%) had experienced  
298 these symptoms for 3 to 6 months, 179 (6.8%) between 2 and 3 months, 157 (5.9%) between 1  
299 and 2 months, 103 (3.9%) between 2 and 4 weeks and 140 (5.3%) between 1 and 2 weeks,  
300 respectively. The duration of the ten common symptoms at the time of the follow-up is  
301 shown in **Figure 2**.

302

|                                                          |                                            | Total                  | Laboratory-confirmed<br>RT-PCR "+" (n=1358) | Clinically diagnosed<br>RT-PCR "-" (n=1291) |
|----------------------------------------------------------|--------------------------------------------|------------------------|---------------------------------------------|---------------------------------------------|
| Age (median, IQR)                                        |                                            | 56 (46-66)             | 57 (47-67)                                  | 55 (44-65)                                  |
| Age groups (years)                                       | <50                                        | 870 (32.8%)            | 407 (30%)                                   | 463 (35.9%)                                 |
|                                                          | 50-69                                      | 1294 (48.8%)           | 673 (49.6%)                                 | 621 (48.1%)                                 |
|                                                          | 70-79                                      | 304 (11.5%)            | 169 (12.4%)                                 | 135 (10.5%)                                 |
|                                                          | ≥80                                        | 181 (6.8%)             | 109 (8%)                                    | 72 (5.6%)                                   |
| Sex                                                      | Female                                     | 1353 (51.1%)           | 683 (50.3%)                                 | 670 (51.9%)                                 |
| Time from admission to discharge, days                   | Median (IQR)                               | 14.6 (12-17.6)         | 15.1 (12.8-18.7)                            | 13.7 (11.6-16.1)                            |
| Time since discharge, days                               | Median (IQR)                               | 217.5<br>(200.4-235.5) | 215.3<br>(195.5-234.5)                      | 220.5<br>(204.4-237.3)                      |
| Highest completed educational level                      | School                                     | 240 (9.5%)             | 125 (9.7%)                                  | 115 (9.3%)                                  |
|                                                          | University                                 | 1948 (77.4%)           | 989 (76.8%)                                 | 959 (78%)                                   |
|                                                          | Not completed formal education or training | 37 (1.5%)              | 13 (1%)                                     | 24 (2%)                                     |
| <b>Occupation/ Working status</b>                        |                                            |                        |                                             |                                             |
| Occupation/working status before Covid-19                | Working full-time                          | 1473 (57.5%)           | 745 (54.9%)                                 | 728 (56.4%)                                 |
|                                                          | Working part-time                          | 58 (2.3%)              | 25 (1.8%)                                   | 33 (2.6%)                                   |
|                                                          | Full time carer (children or others)       | 47 (1.8%)              | 22 (1.6%)                                   | 25 (1.9%)                                   |
|                                                          | Unemployed                                 | 47 (1.8%)              | 23 (1.7%)                                   | 24 (1.9%)                                   |
|                                                          | Unable to work due to chronic illness      | 5 (0.2%)               | 2 (0.1%)                                    | 3 (0.2%)                                    |
|                                                          | Student                                    | 21 (0.8%)              | 8 (0.6%)                                    | 13 (1%)                                     |
|                                                          | Retired/ Early retirement due to illness   | 871 (34.0%)            | 459 (33.8%)                                 | 412 (31.9%)                                 |
|                                                          | Do not want to answer                      | 155 (6.1%)             | 82 (6%)                                     | 73 (5.7%)                                   |
| <b>Comorbidities</b>                                     |                                            |                        |                                             |                                             |
| Chronic cardiac disease (not hypertension)               |                                            | 476 (18.1%)            | 273 (20.3%)                                 | 203 (15.8%)                                 |
| Hypertension                                             |                                            | 1219 (46.2%)           | 646 (47.8%)                                 | 573 (44.4%)                                 |
| Revascularization of peripheral and/or coronary arteries |                                            | 98 (3.7%)              | 68 (5.1%)                                   | 30 (2.3%)                                   |
| Chronic pulmonary disease (not asthma)                   |                                            | 193 (7.3%)             | 110 (8.2%)                                  | 83 (6.5%)                                   |
| Asthma (physician diagnosed)                             |                                            | 121 (4.6%)             | 73 (5.4%)                                   | 48 (3.7%)                                   |
| Chronic kidney disease                                   |                                            | 123 (4.7%)             | 72 (5.4%)                                   | 51 (4%)                                     |

|                                        |                                                                                                  |              |             |             |
|----------------------------------------|--------------------------------------------------------------------------------------------------|--------------|-------------|-------------|
| Obesity (as defined by clinical staff) |                                                                                                  | 514 (19.6%)  | 263 (19.6%) | 251 (19.6%) |
| Moderate or severe liver disease       |                                                                                                  | 19 (0.7%)    | 11 (0.8%)   | 8 (0.6%)    |
| Mild liver disease                     |                                                                                                  | 50 (1.9%)    | 24 (1.8%)   | 26 (2%)     |
| Asplenia                               |                                                                                                  | 8 (0.3%)     | 4 (0.3%)    | 4 (0.3%)    |
| Chronic neurological disorder          |                                                                                                  | 121 (4.6%)   | 78 (5.8%)   | 43 (3.4%)   |
| Malignant neoplasm                     |                                                                                                  | 93 (3.5%)    | 62 (4.6%)   | 31 (2.4%)   |
| Chronic hematologic disease            |                                                                                                  | 30 (1.1%)    | 21 (1.6%)   | 9 (0.7%)    |
| AIDS / HIV                             | on ART                                                                                           | 4 (0.2%)     | 0 (0%)      | 4 (0.3%)    |
|                                        | not on ART                                                                                       | 5 (0.2%)     | 3 (0.2%)    | 2 (0.2%)    |
| Diabetes Mellitus                      | Type 1                                                                                           | 13 (0.5%)    | 6 (0.4%)    | 7 (0.5%)    |
|                                        | Type 2                                                                                           | 369 (14.1%)  | 198 (14.7%) | 171 (13.4%) |
| Rheumatologic disorder                 |                                                                                                  | 96 (3.7%)    | 43 (3.2%)   | 53 (4.1%)   |
| Dementia                               |                                                                                                  | 25 (1%)      | 18 (1.3%)   | 7 (0.5%)    |
| Tuberculosis                           |                                                                                                  | 2 (0.1%)     | 1 (0.1%)    | 1 (0.1%)    |
| Malnutrition                           |                                                                                                  | 6 (0.2%)     | 2 (0.1%)    | 4 (0.3%)    |
| With no comorbidities                  |                                                                                                  | 908 (34.3%)  | 452 (33.3%) | 456 (35.3%) |
| With 1 comorbidity                     |                                                                                                  | 723 (27.3%)  | 341 (25.1%) | 382 (29.6%) |
| With 2 comorbidities                   |                                                                                                  | 512 (19.3%)  | 267 (19.7%) | 245 (19%)   |
| With 3+ comorbidities                  |                                                                                                  | 506 (19.1%)  | 298 (21.9)  | 208 (16.1%) |
| <b>COVID-19 Severity</b>               |                                                                                                  |              |             |             |
|                                        | Mild (not requiring supplementary oxygen or ventilation)                                         | 1679 (63.4%) | 841 (61.9%) | 838 (64.9%) |
|                                        | Moderate (requiring only supplementary oxygen)                                                   | 902 (34%)    | 479 (35.3%) | 423 (32.8%) |
|                                        | Severe (requiring non-invasive ventilation, or invasive ventilation or intensive care admission) | 68 (2.6%)    | 38 (2.8%)   | 30 (2.3%)   |

**Table 1.** Demographic characteristics of patients admitted to the Sechenov University Hospital Network. Data are n (%), n/N (%), or median (IQR). Statistically significant results (p<0.05) are highlighted in bold.

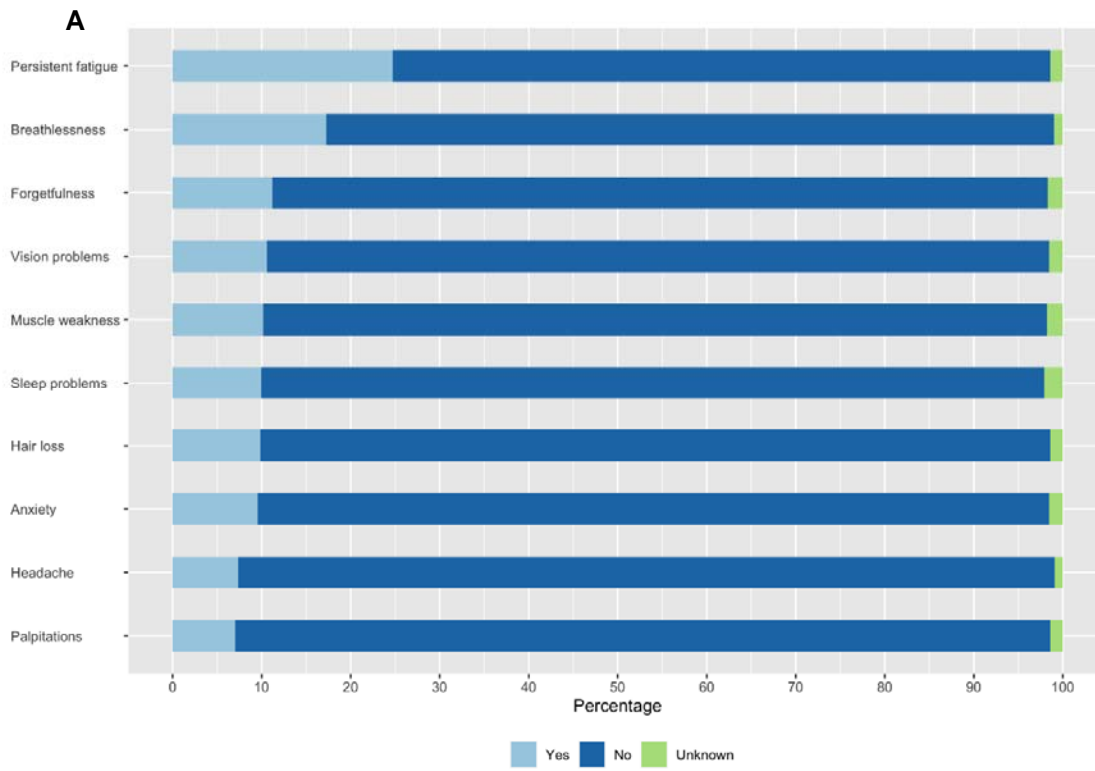

303

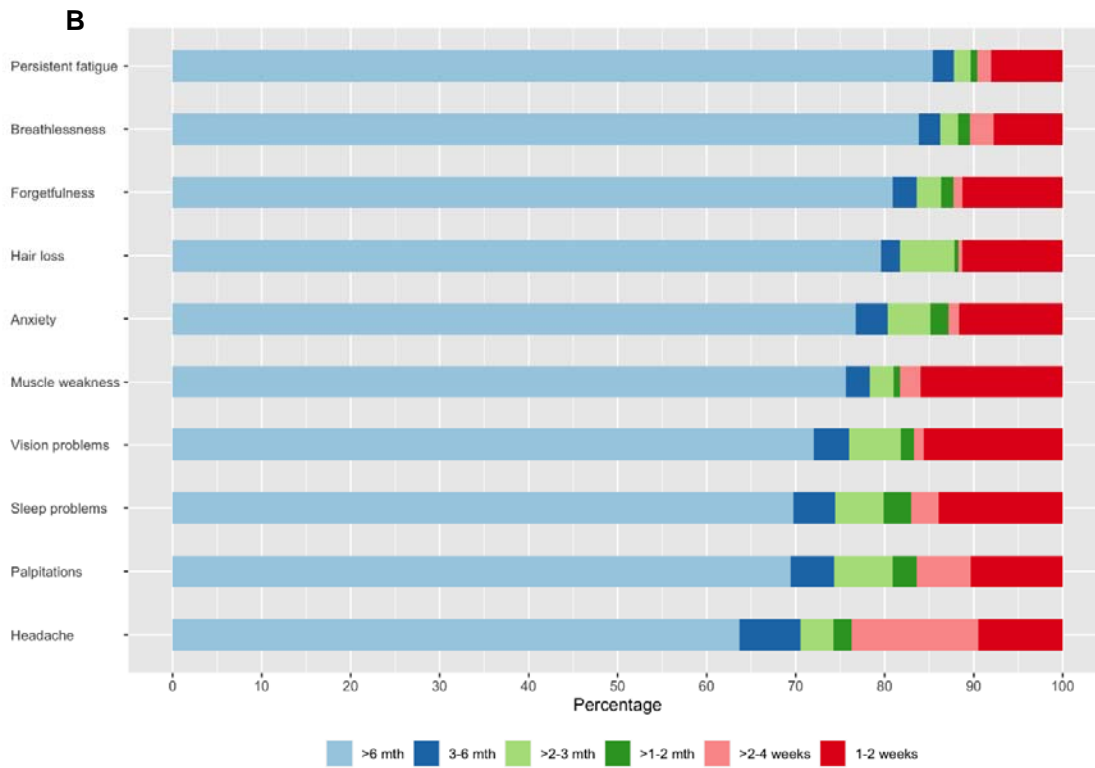

304

305

306

307

**Figure 2.** Stacked bar charts presenting (a) prevalence and (b) duration of ten most common symptoms reported at the time of the follow-up interview. The full data is shown in the Table S2.

308 A degree of overlap was found between the five most common LS, with 79/900 (8.8%) of  
309 patients experiencing both persistent fatigue and breathlessness, 54 (6%) persistent fatigue  
310 and muscle weakness. A smaller proportion of patients reported a combination of persistent  
311 fatigue, breathlessness and muscle weakness - 26/900 (2.9%) with 16 (1.8%) patients having  
312 all five (**Figure S1**).

313

314 With regard to categories of LS, chronic fatigue was found to be the most common 658/2593  
315 (25%) at the time of the follow-up interview, followed by respiratory 451/2616 (17.2%),  
316 neurological 375/2586 (14.5%), mood and behaviour changes 284/2591 (11%) and  
317 dermatological 206/2583 (8%) symptoms. A smaller number of patients experienced  
318 gastrointestinal 110/2599 (4.2%) and sensory 70/2622 (2.7%) problems since discharge.

319

320 A small number of the LS categories were co-existent: 174 (6.6%) participants reported LS  
321 from three different categories at the time of the follow-up interview; 88 (3.3%) reported four  
322 categories, and 37 (1.4%) reported five categories or more. Co-existence of five most common  
323 categories of long-standing symptoms at the time of the follow-up interview is presented in  
324 the **Figure S1**.

325

326 Risk factors for all categories were assessed. In multivariable regression analysis, female sex  
327 was a predictor of chronic fatigue with an odds ratio of 1.67 (95% confidence interval 1.39 to  
328 2.02), neurological (2.03, 1.60 to 2.58), mood and behaviour (1.83, 1.41 to 2.40),  
329 dermatological (3.26, 2.36 to 4.57), gastrointestinal (2.50, 1.64 to 3.89), sensory (1.73, 2.06  
330 to 2.89) and respiratory (1.31, 1.06 to 1.62) long-standing symptom categories, respectively.  
331 The effect of female sex remained unchanged in the sensitivity analyses, which included  
332 patients with RT-PCR-confirmed COVID-19 only, for all categories except respiratory and  
333 sensory. Pre-existing asthma was consistently associated with neurological (1.95, 1.25 to  
334 2.98) and mood and behavioural changes (2.02, 1.24 to 3.18) (**Figures 3 and 4**), with  
335 associations remaining significant in the sensitivity analyses. Chronic pulmonary disease was  
336 associated with chronic fatigue (1.68, 1.21 to 2.32) (**Figure 5**) and gastrointestinal (1.93, 1.02  
337 to 3.43) long-standing symptom categories development. However, an association with  
338 gastrointestinal symptoms was not confirmed in the sensitivity analysis. Rheumatological  
339 disorder was associated with the mood and behavioural long-standing symptoms (1.97, 1.12-  
340 3.33), but the effect was not confirmed in the sensitivity analysis. Confirmed RT-PCR during  
341 acute phase was significantly associated with chronic fatigue, neurological, mood and  
342 behaviour and gastrointestinal categories, confirming importance of the sensitivity analyses.  
343 More details of primary and sensitivity analyses are presented in **Table 2** and forest plots  
344 are available as **supplementary material**.

345 Dyspnoea of different severity was reported by 318 (12%) patients during follow-up with 194  
346 (7.3%) equivalent to grade 3, 93 (3.5%) grade 4 and 31 (1.2%) grade 5 according to MRC  
347 Dyspnoea Scale (**Table S3**).

348

349 Participants reported lower scores (poorer health state) on the EuroQol visual analog scale at  
350 follow-up compared with pre-COVID-19 onset, median 80 (IQR, 65-90) vs 85 (70-95)  
351 ( $p < 0.001$ ). Significant worsening of the health state compared with pre-COVID 19 was found  
352 across all symptom categories, with the highest median difference reported by patients with  
353 gastrointestinal (-15), mood and behaviour (-13) and neurological (-10.5) symptoms  
354 ( $p < 0.001$  for all) (**Table S4**). No statistically significant reduction in health state was found  
355 among patients reporting no symptoms. Participants falling into all symptom categories had  
356 significantly lower health state than those with no symptoms ( $p < 0.001$  for all).

357



| Long-standing symptom Category (n <sup>†</sup> ) | Risk factor               | Primary analysis OR (95%CI) | Sensitivity analysis OR (95%CI) | Consistently associated factors* |
|--------------------------------------------------|---------------------------|-----------------------------|---------------------------------|----------------------------------|
| Chronic fatigue (n = 658)                        | Female Sex                | <b>1.67 (1.39-2.02)</b>     | <b>1.81 (1.40-2.34)</b>         | Female Sex                       |
|                                                  | Chronic pulmonary disease | <b>1.68 (1.21-2.32)</b>     | <b>1.66 (2.08-2.54)</b>         | Chronic pulmonary disease        |
|                                                  | Hypertension              | <b>1.27 (1.02-1.57)</b>     | 1.27 (0.94-1.72)                |                                  |
|                                                  | RT-PCR “+”                | <b>1.23 (1.02-1.47)</b>     | NA                              |                                  |
| Respiratory (n = 451)                            | Female Sex                | <b>1.31 (1.06-1.62)</b>     | 1.21 (0.90-1.62)                | No                               |
| Neurological (n = 375)                           | Female Sex                | <b>2.03 (1.60-2.58)</b>     | <b>2.21 (1.54-2.93)</b>         | Female Sex                       |
|                                                  | Asthma                    | <b>1.95 (1.25-2.98)</b>     | <b>2.18 (1.24-3.73)</b>         | Asthma                           |
|                                                  | RT-PCR “+”                | <b>1.30 (1.04-1.63)</b>     | NA                              |                                  |
| Mood and behaviour (n = 284)                     | Female Sex                | <b>1.83 (1.41-2.40)</b>     | <b>1.73 (1.22-2.47)</b>         | Female Sex                       |
|                                                  | Asthma                    | <b>2.02 (1.24-3.18)</b>     | <b>2.39 (1.31-4.20)</b>         | Asthma                           |
|                                                  | Rheumatological disorder  | <b>1.97 (1.12-3.33)</b>     | 1.62 (0.69-3.45)                |                                  |
|                                                  | RT-PCR “+”                | <b>1.45 (1.12-1.87)</b>     | NA                              |                                  |
| Gastrointestinal (n = 206)                       | Female Sex                | <b>2.50 (1.64-3.89)</b>     | <b>2.78 (1.61-4.96)</b>         | Female Sex                       |
|                                                  | Chronic pulmonary disease | <b>1.93 (1.02-3.43)</b>     | 1.36 (0.54-2.99)                |                                  |
|                                                  | RT-PCR “+”                | <b>1.56 (1.05-2.33)</b>     | NA                              |                                  |
| Dermatological (n = 110)                         | Female Sex                | <b>3.26 (2.36-4.57)</b>     | <b>3.08 (1.99-4.88)</b>         | Female Sex                       |
| Sensory (n = 70)                                 | Female Sex                | <b>1.73 (2.06-2.89)</b>     | 1.54 (0.78-3.07)                | No                               |

**Table 2.** Risk factors significantly associated with the different categories of long-standing symptoms in the primary (age, sex, comorbidities, severity and RT-PCR were included

as potential risk factors) and sensitivity (performed in a subgroup of RT-PCR positive patients only) multivariable regression analyses. \*- The assessment of robustness is based on the magnitude, direction and/or statistical significance of the estimates. †- Number of patients with at least one long-standing symptom from this category) Statistically significant associations are presented in bold. Abbreviations: OR, Odds Ratio; CI, Confidence interval; NA, Not applicable; RT-PCR “+”, Real-time polymerase chain reaction confirmed SARS-CoV-2 infection.

**A**

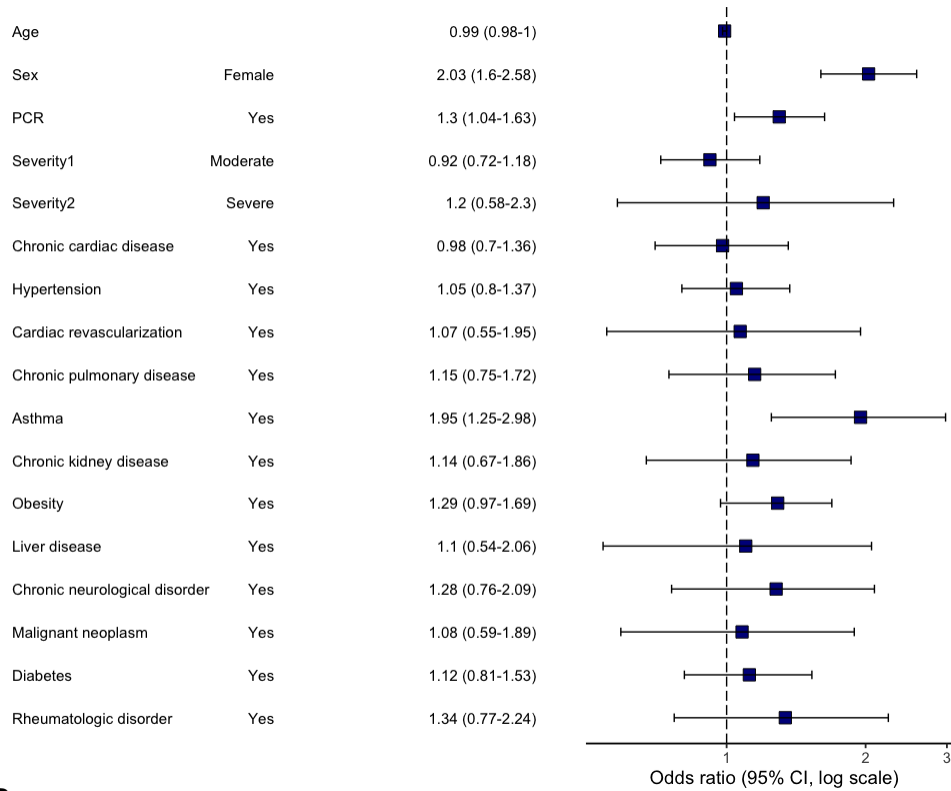

358

**B**

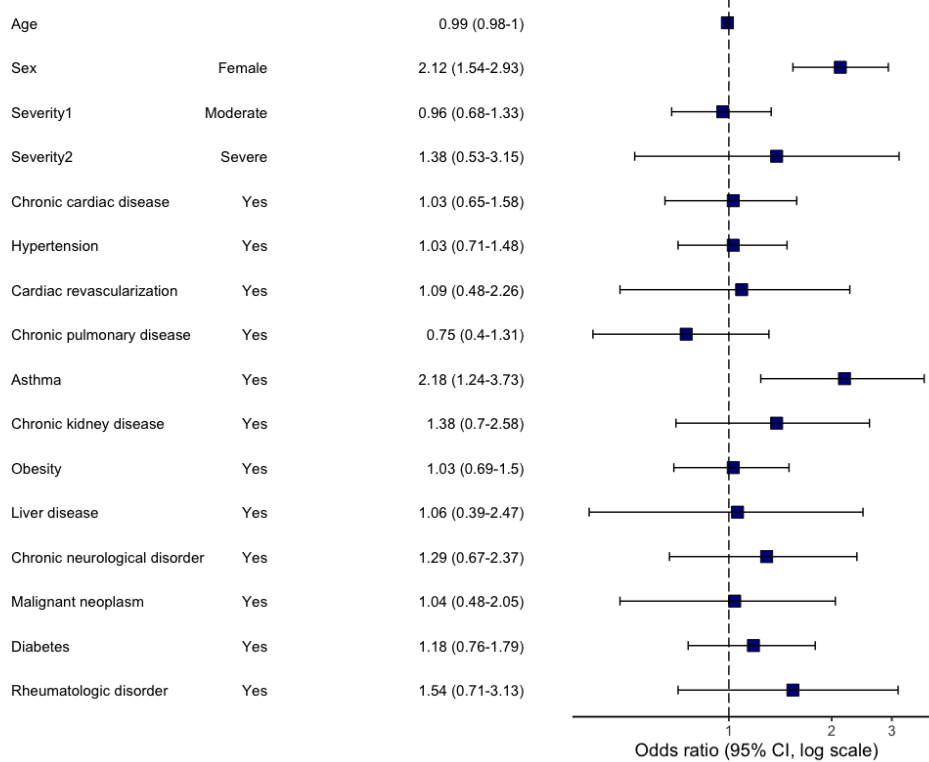

359

360

361

362

363

Figure 3. Multivariable logistic regression model. Odds ratios and 95% CIs for “Neurological” category of long-standing symptoms at the time of follow-up. Abbreviation: CI, confidence interval. (a) primary analysis (age, sex, comorbidities, severity and RT-PCR were included as potential risk factors); (b) sensitivity analysis (performed in a subgroup of RT-PCR positive patients only).

**A**

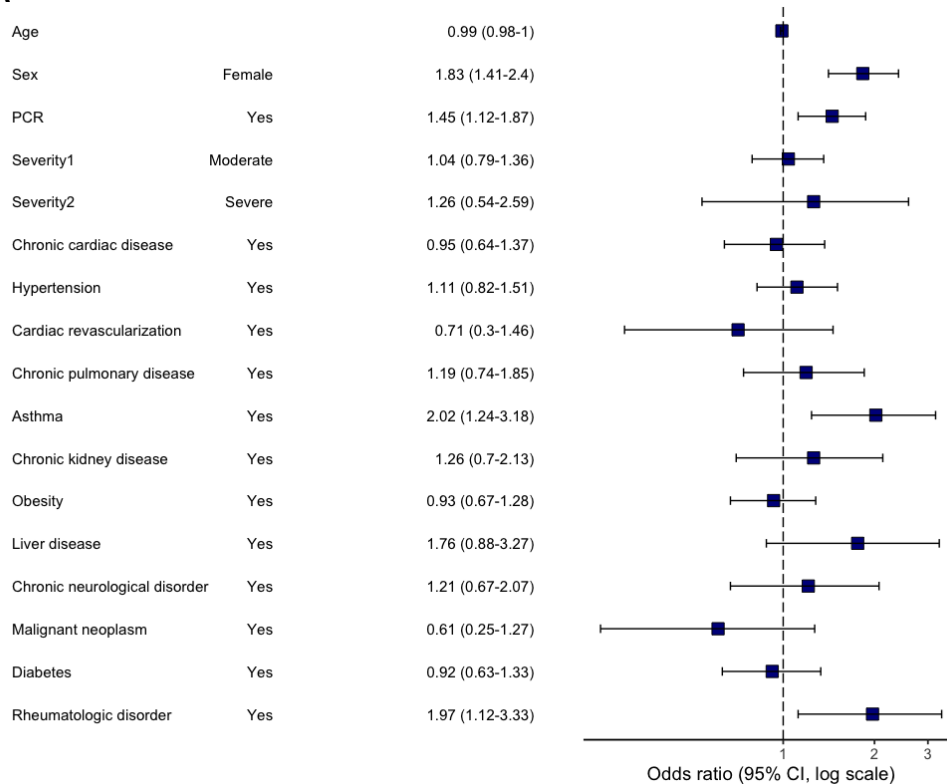

364

**B**

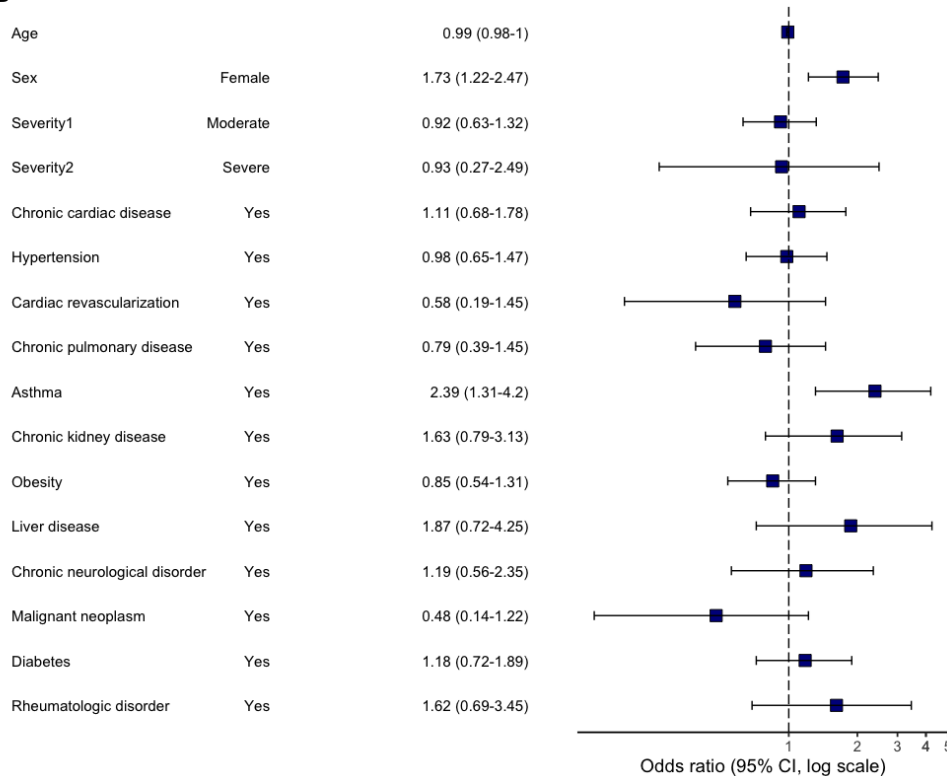

365

366

367

368

369

Figure 4. Multivariable logistic regression model. Odds ratios and 95% CIs for “Mood and behaviour” category of long-standing symptoms at the time of follow-up. Abbreviation: CI, confidence interval. (a) primary analysis (age, sex, comorbidities, severity and RT-PCR were included as potential risk factors); (b) sensitivity analysis (performed in a subgroup of RT-PCR positive patients only).



**A**

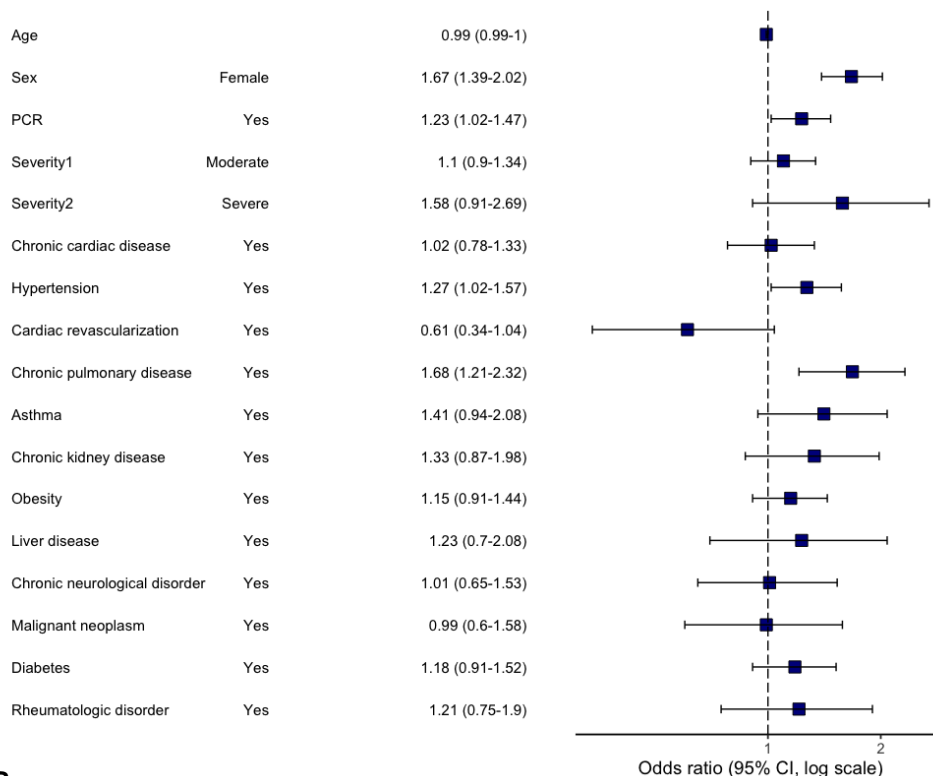

371

**B**

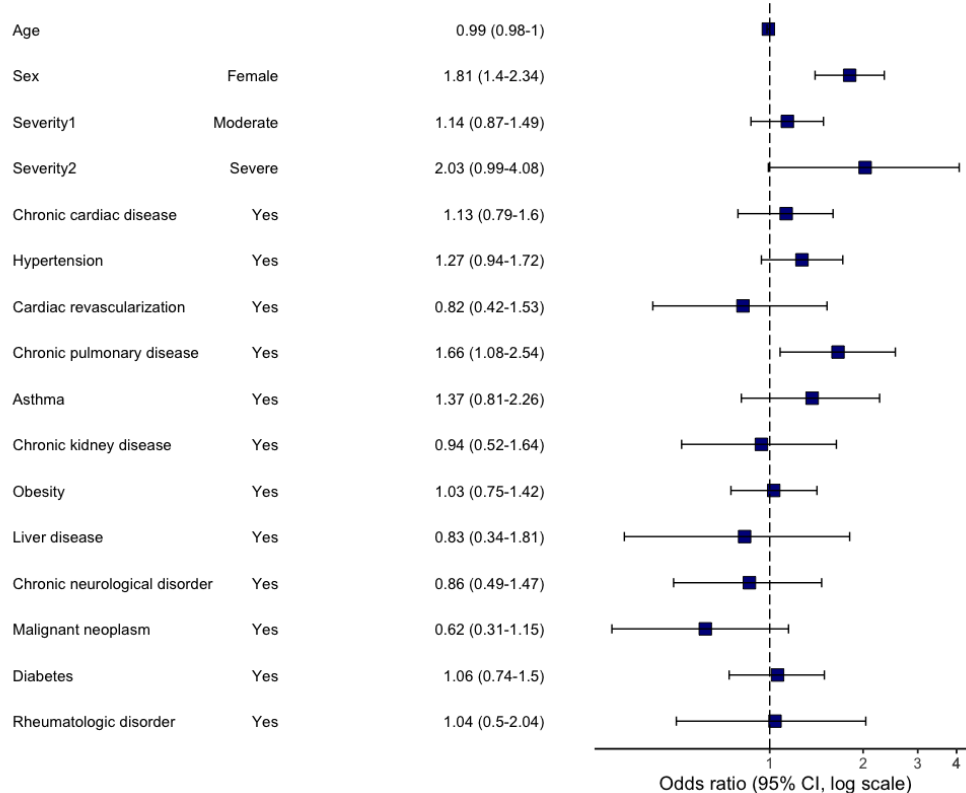

372

373

374

375

376

Figure 5. Multivariable logistic regression model. Odds ratios and 95% CIs for “Chronic fatigue” category of long-standing symptoms at the time of follow-up. Abbreviation: CI, confidence interval. (a) primary analysis (age, sex, comorbidities, severity and RT-PCR were included as potential risk factors); (b) sensitivity analysis (performed in a subgroup of RT-PCR positive patients only)

## 377 **DISCUSSION**

378 To our knowledge, this is the prospective cohort study with the largest sample size and the  
379 longest follow-up duration, assessing the long-term health and psycho-social consequences  
380 of COVID-19 in hospitalised adults. The cohort included a similar number of RT-PCR-  
381 confirmed COVID-19 and those who were clinically diagnosed with COVID-19. We found  
382 that six of ten patients experienced at least one symptom of any duration 6 to 8 months after  
383 hospital discharge and almost a half of the patients reported at least one LS, with chronic  
384 fatigue and respiratory problems being the most frequent LS categories. One in ten patients  
385 reported multisystem impacts with three or more categories of long-standing symptoms  
386 present at follow-up. LS were experienced by males and females, with a higher risk amongst  
387 women, with chronic pulmonary disease associated with chronic fatigue, and asthma with a  
388 higher risk of neurological symptoms and mood and behaviour problems.

389

390 The majority of patients experienced LS from the time of discharge, with a smaller number  
391 developing symptoms months following discharge. Persistent fatigue and breathlessness  
392 were the most frequent LS in our cohort, which is consistent with recent report from China <sup>6</sup>.  
393 Forgetfulness and vision problems were also among the most common, while problems  
394 sleeping was less common (10.2%) compared to rates reported by the recent follow-up data  
395 from China (26%) <sup>6</sup>.

396

397 A novel findings relates to the development of symptoms weeks or months since recovery  
398 from COVID-19. To our knowledge, this aspect has not been investigated in previous studies,  
399 as most of the cohorts did not collect data on the duration of the symptoms present at follow-  
400 up. Patterns of the symptom development following COVID-19 should be further  
401 investigated in future research.

402

403 Female sex was significantly associated with an increased risk of LS, regardless of symptom  
404 category, reflecting previous findings <sup>6</sup> and digital App <sup>16</sup> studies. Chronic pulmonary disease  
405 was a risk factor for the development of chronic fatigue. An association between chronic  
406 pulmonary disease and severe acute COVID-19 was found in many studies <sup>17</sup>, but it has not  
407 been previously reported as a risk factor for COVID-19 sequelae. The presence of chronic  
408 pulmonary disease has been previously associated with chronic fatigue syndrome <sup>18</sup>. The  
409 pandemic also had a significant adverse impact on care and support for patients with chronic  
410 pulmonary conditions, including a reduction in face-to-face clinic availability, lack of access  
411 to pulmonary rehabilitation sessions and hospital care during an exacerbation due to fear of  
412 COVID-19 exposure <sup>19</sup>. The causality cannot be determined and we are unable to conclude if  
413 lack of follow-up and involvement in rehabilitation programmes for chronic pulmonary

414 conditions was the cause of ongoing symptoms. Future research should investigate COVID-  
415 19 consequences in this group of patients in greater detail.

416

417 Data from the COVID Symptom Study app in the UK suggested that asthma may be a risk  
418 factor for LS related to COVID-19<sup>16</sup>. We also found that asthma was associated with an  
419 increased risk of LS during follow-up, specifically neurological and mood and behaviour.  
420 Although asthma has not been associated with a higher risk of hospital admission and/or in-  
421 hospital mortality in COVID-19 patients,<sup>20,21</sup> different results may be found when  
422 considering the long-term consequences of infection. Recent research suggested that COVID-  
423 19 sequelae may be associated with the mast cell activation syndrome<sup>22</sup> and the Th-2 biased  
424 immunological response in asthmatic patients may be responsible for an increased risk of  
425 long-term implications of the infection. This finding may point to immune mediated  
426 mechanisms but requires confirmation in a larger sample size with a more detailed  
427 investigation, including in-clinic visits.

428

429 It is worth noting that in contrast to the Chinese cohort<sup>6</sup>, we did not find significant  
430 associations between COVID-19 severity and long-term symptom development. This may be,  
431 however, related to the difference in the methodology applied and the small number of  
432 severe patients in our cohort. There is a need for further investigation of the frequency with  
433 which mild infection are followed by long-term symptoms, mandating a study of non-  
434 hospitalised infected subjects.

435

436 Patients with all categories of LS reported significantly lower health state when compared  
437 with symptom-free patients. They also considered the health state to be lower than before  
438 the COVID-19 episode. This is consistent with previous reports from different countries<sup>5,6,23</sup>.  
439 This finding points to the multi-factorial adverse effects of COVID-19 and to the need for  
440 wide ranging and longer term supports.

441

442 A major strength of this study is use of pre-positioned data collection method using ISARIC  
443 Core CRF for acute phase data and ISARIC Long-term Follow-up Study CRF. Another  
444 strength is the large sample size, as this cohort is the largest follow-up assessment of  
445 hospitalised adults to date. Stratification to determine if the symptoms were persistent  
446 following COVID-19 was another novel aspect of the study. At the same time, this cohort  
447 study has some limitations. First, the study population only included patients within  
448 Moscow, although regional clustering is common to all major cohort studies published  
449 during the COVID-19 pandemic. Second, acute data were collected from the electronic  
450 medical records with no access to additional information that could be potentially retrieved

451 from the medical notes. Third, almost half of the patients in our cohort did not have RT-PCR  
452 confirmed COVID-19 infection, although our previous work <sup>3</sup> showed that clinical features of  
453 COVID-19 and in-hospital mortality were the same in COVID-19 clinically diagnosed and  
454 laboratory-confirmed cases. We also performed sensitivity analyses using data from the  
455 laboratory-confirmed COVID-19 patients only to ensure consistency and robustness of the  
456 findings. Fifth, some patients may have developed additional comorbidities or complications  
457 since the hospital discharge, which were not appropriately captured and could potentially  
458 affect the QoL and symptom prevalence and persistence. There is also a risk of recall bias in  
459 reporting quality of life and dyspnoea preceding COVID-19.

460

461 At 6-8 months follow-up, many patients experienced symptoms from the time of hospital  
462 discharge, with chronic fatigue and respiratory problems being the most common sequelae.  
463 Most patients reported symptoms at 6-8 months from the time of discharge, although a  
464 subgroup reported symptoms limited to a few weeks and/or months after the acute phase.  
465 One in ten individuals had multi-system involvement at the time of the follow-up. Female  
466 sex was the main risk factor for most of the long-lasting symptom categories development,  
467 while chronic pulmonary disease was associated with a higher risk of chronic fatigue  
468 development and asthma with the neurological and mood and behaviour changes. Future  
469 studies should focus on patients with multisystem involvement and longer follow-up of a  
470 large sample will allow for a better understanding of COVID-19 sequelae and help with the  
471 phenotype recognition. Investigation of immunological aspects of the association between  
472 asthma and several long-covid outcomes may identify mechanisms and therapeutic targets  
473 for therapy to mitigate adverse consequences.

474

#### 475 **Acknowledgments**

476 We thank RFBR, grant 20-04-60063 for supporting the work. We would also like to thank  
477 UK Embassy in Moscow for providing a grant supporting our project. We are very grateful to  
478 the Sechenov University Hospital Network clinical staff and to the patients, carers and  
479 families for their kindness and understanding during these difficult times of COVID-19  
480 pandemic. We would like to express our very great appreciation to ISARIC Global COVID-19  
481 follow-up working group for the survey development. We would like to thank Mr Maksim  
482 Kholopov for providing technical support in data collection and database administration. We  
483 are very thankful to Eat & Talk, Luch, Black Market and Academia for providing us the work  
484 space in time of need. We are grateful to Ms Asmik Avagyan, Ms Daria Belykh, Ms Ekaterina  
485 Belyakova, Ms Anna Berbenyuk, Mr Dmitry Eliseev, Ms Mariia Grosheva, Ms Nelli  
486 Khusainova, Ms Maria Kislova, Ms Valeria Klishina, Ms Karina Kovygina, Ms Natalia Kogut,  
487 Ms Yana Kohanovskaya, Ms Anastasia Kuznetsova, Ms Elza Lidzhieva, Ms Nadezhda



488 Markina, Mr Georgiy Novoselov, Ms Anna Pushkareva, Ms Olga Romanova, Ms Maria  
489 Shoshorina, Ms Jasmin Sibkhan, Ms Olga Spasskaya, Ms Anna Surkova, Ms Nailya  
490 Urmantaeva, Ms Ekaterina Varlamova, Ms Margarita Yegiyanyan, Ms Margarita Zaikina, Ms  
491 Anastasia Zorina, Ms Elena Zuikova for assistance in data extraction, document translation  
492 and help during the project. Finally, we would like to extend our gratitude to the Global  
493 ISARIC team and ISARIC Coordinating Centre for their continuous support, expertise and  
494 for the development of the outbreak ready standardised protocols for the data collection.

## 495 REFERENCES

496

- 497 1. Dong E, Du H, Gardner L. An interactive web-based dashboard to track COVID-19 in  
498 real time. *Lancet Infect Dis* 2020; **20**(5): 533-4.
- 499 2. Docherty AB, Harrison EM, Green CA, et al. Features of 20 133 UK patients in  
500 hospital with covid-19 using the ISARIC WHO Clinical Characterisation Protocol: prospective  
501 observational cohort study. *BMJ* 2020; **369**: m1985.
- 502 3. Munblit D, Nekliudov NA, Bugaeva P, et al. StopCOVID cohort: An observational  
503 study of 3,480 patients admitted to the Sechenov University hospital network in Moscow city  
504 for suspected COVID-19 infection. *Clin Infect Dis* 2020.
- 505 4. Pritchard MG. COVID-19 symptoms at hospital admission vary with age and sex:  
506 ISARIC multinational study. *medRxiv* 2020: 2020.10.26.20219519.
- 507 5. Carfi A, Bernabei R, Landi F, Gemelli Against C-P-ACSG. Persistent Symptoms in  
508 Patients After Acute COVID-19. *JAMA* 2020; **324**(6): 603-5.
- 509 6. Huang C, Huang L, Wang Y, et al. 6-month consequences of COVID-19 in patients  
510 discharged from hospital: a cohort study. *Lancet* 2021; **397**(10270): 220-32.
- 511 7. Michelen M, Manoharan L, Elkheir N, et al. Characterising long-term covid-19: a  
512 rapid living systematic review. *medRxiv* 2020: 2020.12.08.20246025.
- 513 8. Wise J. Long covid: WHO calls on countries to offer patients more rehabilitation. *BMJ*  
514 2021; **372**: n405.
- 515 9. Meeting the challenge of long COVID. *Nat Med* 2020; **26**(12): 1803.
- 516 10. The L. Facing up to long COVID. *The Lancet* 2020; **396**(10266): 1861.
- 517 11. National Institute for Health and Care Excellence (NICE) tSIGNSatRCoGPR. COVID-  
518 19 rapid guideline: managing the long-term effects of COVID-19. 2020.  
519 <https://www.nice.org.uk/guidance/ng188> (accessed 15-th of January 2021).
- 520 12. Consortium. ISARIC. COVID-19 CORE CASE REPORT FORM ACUTE  
521 RESPIRATORY INFECTION CLINICAL CHARACTERISATION DATA TOOL. 2020.  
522 [https://isaric.org/wp-](https://isaric.org/wp-content/uploads/2020/10/ISARIC_WHO_nCoV_CORE_CRF_25.08.2020.pdf)  
523 [content/uploads/2020/10/ISARIC\\_WHO\\_nCoV\\_CORE\\_CRF\\_25.08.2020.pdf](https://isaric.org/wp-content/uploads/2020/10/ISARIC_WHO_nCoV_CORE_CRF_25.08.2020.pdf) (accessed 6-th  
524 of February 2021).
- 525 13. The World Health Organization. Global COVID-19 Clinical Platform Case Report  
526 Form (CRF) for Post COVID condition (Post COVID-19 CRF). 2021.  
527 [https://www.who.int/publications/i/item/global-covid-19-clinical-platform-case-report-form-](https://www.who.int/publications/i/item/global-covid-19-clinical-platform-case-report-form-(crf)-for-post-covid-conditions-(post-covid-19-crf-))  
528 [\(crf\)-for-post-covid-conditions-\(post-covid-19-crf-\)](https://www.who.int/publications/i/item/global-covid-19-clinical-platform-case-report-form-(crf)-for-post-covid-conditions-(post-covid-19-crf-)) (accessed 10-th of February 2021).
- 529 14. Davis HE, Assaf GS, McCorkell L, et al. Characterizing Long COVID in an  
530 International Cohort: 7 Months of Symptoms and Their Impact. *medRxiv* 2020:  
531 2020.12.24.20248802.
- 532 15. Greenhalgh T, Knight M, A'Court C, Buxton M, Husain L. Management of post-acute  
533 covid-19 in primary care. *BMJ* 2020; **370**: m3026.

- 534 16. Sudre CH, Murray B, Varsavsky T, et al. Attributes and predictors of Long-COVID:  
535 analysis of COVID cases and their symptoms collected by the Covid Symptoms Study App.  
536 *medRxiv* 2020: 2020.10.19.20214494.
- 537 17. Zhao Q, Meng M, Kumar R, et al. The impact of COPD and smoking history on the  
538 severity of COVID-19: A systemic review and meta-analysis. *J Med Virol* 2020; **92**(10): 1915-  
539 21.
- 540 18. Baghai-Ravary R, Quint JK, Goldring JJ, Hurst JR, Donaldson GC, Wedzicha JA.  
541 Determinants and impact of fatigue in patients with chronic obstructive pulmonary disease.  
542 *Respir Med* 2009; **103**(2): 216-23.
- 543 19. Leung JM, Niikura M, Yang CWT, Sin DD. COVID-19 and COPD. *Eur Respir J* 2020;  
544 **56**(2).
- 545 20. Avdeev S, Moiseev S, Brovko M, et al. Low prevalence of bronchial asthma and  
546 chronic obstructive lung disease among intensive care unit patients with COVID-19. *Allergy*  
547 2020.
- 548 21. Ferastraoaru D, Hudes G, Jerschow E, et al. Eosinophilia in Asthma Patients Is  
549 Protective Against Severe COVID-19 Illness. *J Allergy Clin Immunol Pract* 2021.
- 550 22. Afrin LB, Weinstock LB, Molderings GJ. Covid-19 hyperinflammation and post-Covid-  
551 19 illness may be rooted in mast cell activation syndrome. *Int J Infect Dis* 2020; **100**: 327-32.
- 552 23. Arnold DT, Hamilton FW, Milne A, et al. Patient outcomes after hospitalisation with  
553 COVID-19 and implications for follow-up: results from a prospective UK cohort. *Thorax* 2020.  
554
